# Supplementary material
Source: MDPI journal article supplement (https://www.mdpi.com/2076-3263/13/2/60)
Supplement: s1 [file s1]

Archive with 1 entries (1 files):
- geosciences-2117051-supplementary.pdf
